# Supplementary material
Source: Springer Nature journal article supplement (https://www.springermedizin.de/resource/supplementary/12907_2005_31_MOESM3_ESM.pdf/9524954)

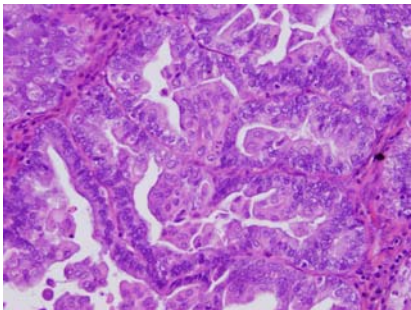

**3a**

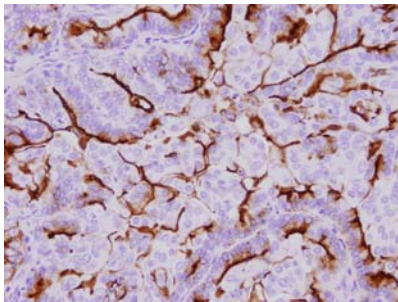

**3b**

Supplement: MOESM3 [file 9524954]
